# Supplementary material
Source: publisher figshare collection journal article supplement (https://frontiersin.figshare.com/ndownloader/files/14367899)
Supplement: Supplementary file [file 14367899]

### Supporting Information

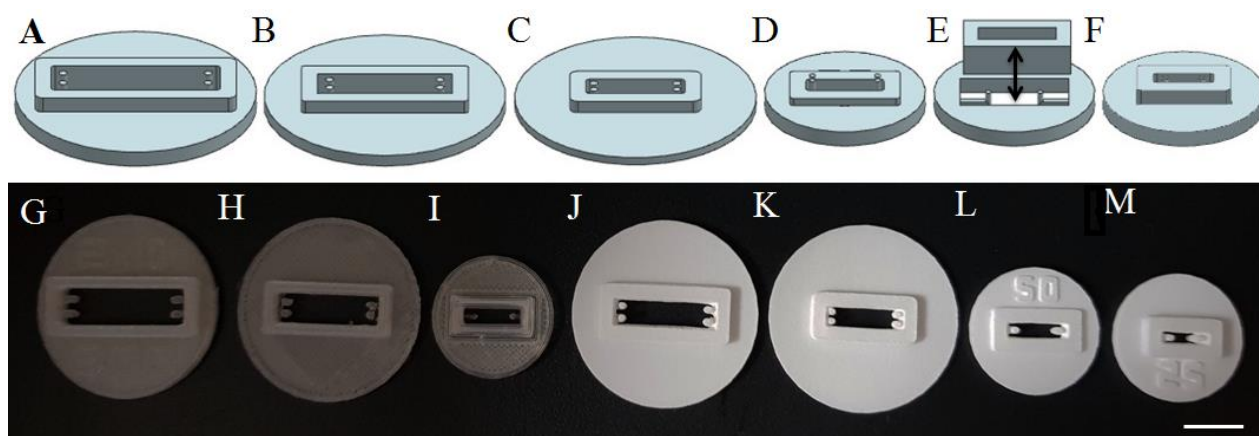

Fig.S1. CAD model of (A) 500  $\mu\text{L}$  mould (B) 250  $\mu\text{L}$  mould (C) 100  $\mu\text{L}$  mould (D) 50  $\mu\text{L}$  mould (E) 2-part 50  $\mu\text{L}$  mould (F) 25  $\mu\text{L}$  mould (G) 500  $\mu\text{L}$  mould printed via FDM (H) 250  $\mu\text{L}$  mould printed via FDM (I) 2-part 50  $\mu\text{L}$  mould printed via FDM (J) 250  $\mu\text{L}$  mould printed via LS (K) 100  $\mu\text{L}$  mould printed via LS (L) 50  $\mu\text{L}$  mould printed via LS (M) 25  $\mu\text{L}$  mould printed via LS. Scale bar = 10 mm.

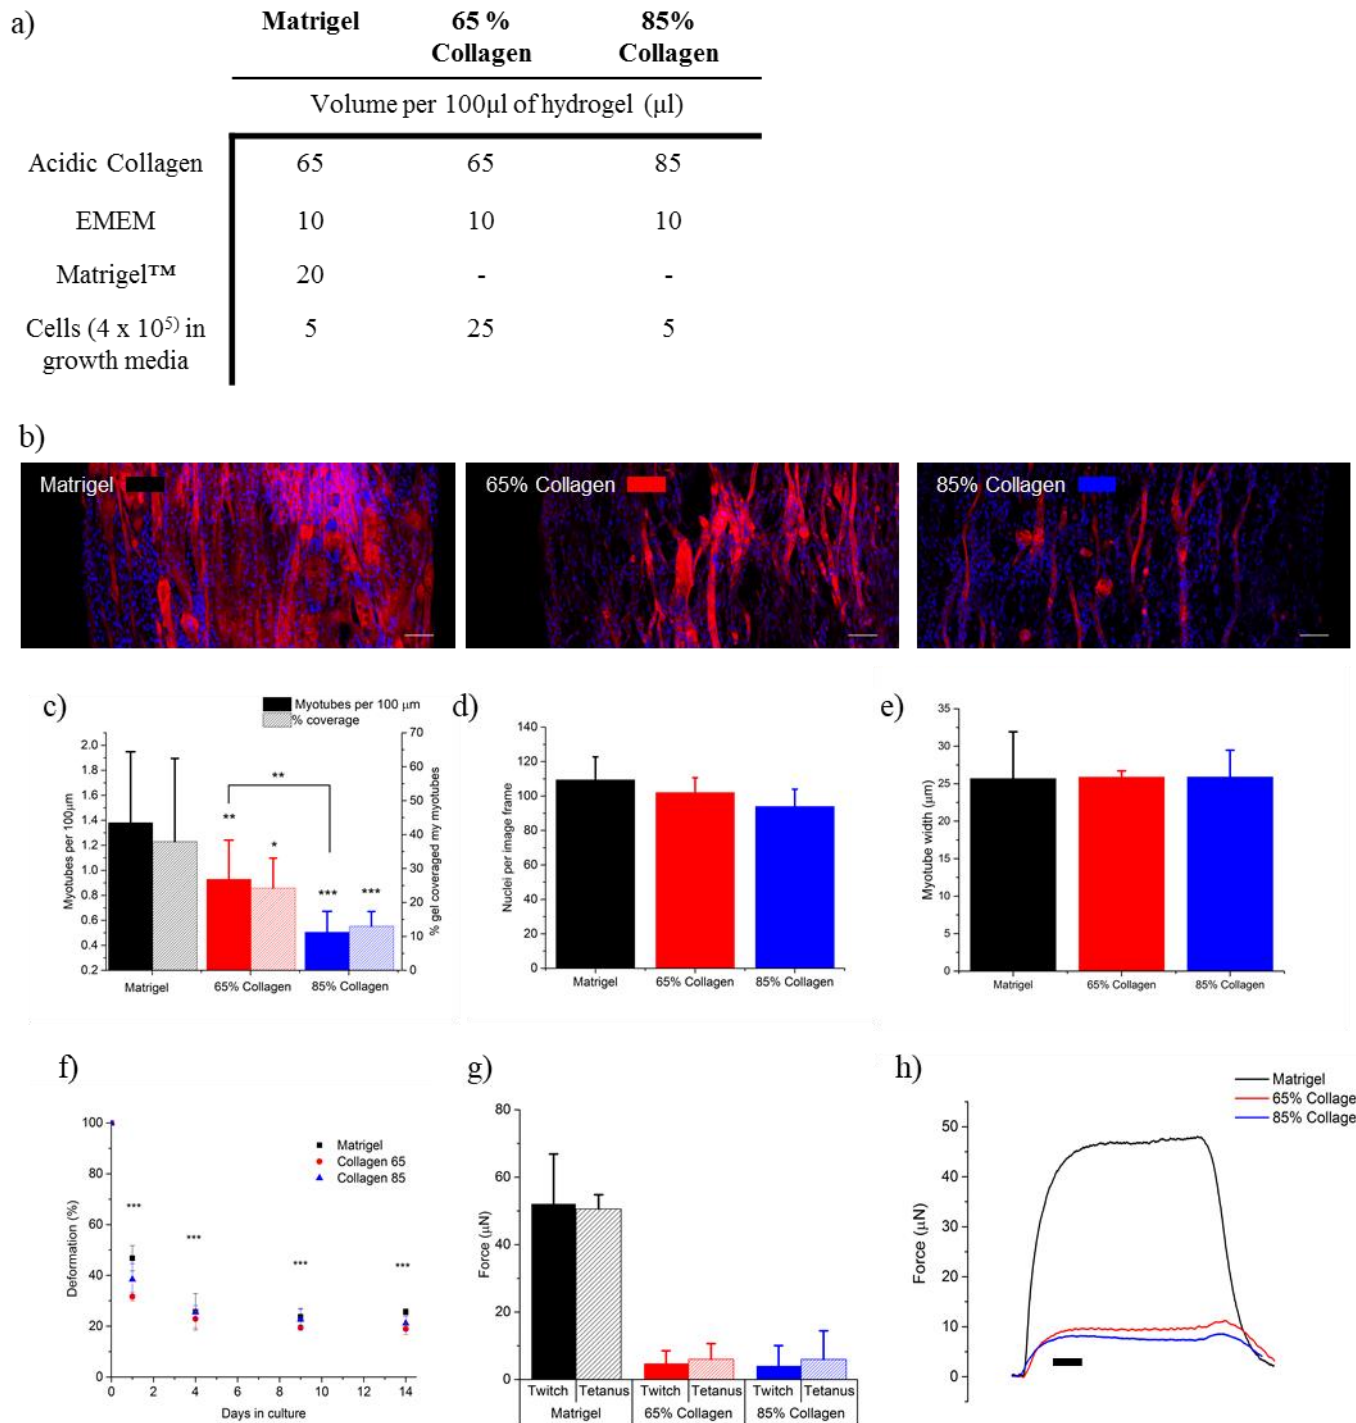

Fig.S2. Inclusion of Matrigel® into hydrogel constructs causes an increase in morphological maturity and force generation. (a) Table showing the composition of each hydrogel, volumes in table are per 100µl (two gels) and so can also be considered as percentages (b) Representative confocal micrographs at 40x magnification, phalloidin staining (red) and DAPI (blue) identify actin and nuclei respectively. Scale bars represent 100µm (c) Myotube density expressed as myotubes per 100µm (solid bars) and as percentage of gel covered by myotubes (hashed bars). Mean  $\pm$  SD. Asterisks denote significance from control \*  $p < 0.05$ , \*\*  $p < 0.01$ , \*\*\*  $p < 0.001$ . (d) Nuclei per image frame Mean  $\pm$  SD. (e) Myotube width, Mean  $\pm$  SD. (f) Deformation calculated from images of hydrogels over time, expressed as a percentage of the area of the hydrogel at day 0, asterisks denote significance from control \*\*\*  $p < 0.001$ . No significance between groups is present. (g) Twitch (1Hz) and Tetanus (100Hz) force measurements for 3 different hydrogel compositions. (h) Representative force traces for tetanic twitches for each hydrogel formulation. Scale bar represents 100ms.

Table S1: Internal culture dimensions for each of the collagen gel moulds used.

| Collagen Gel Volume (µL) | Collagen Gel Length (mm) | Collagen Gel Width (mm) | Length:Width Ratio |
|--------------------------|--------------------------|-------------------------|--------------------|
| 500                      | 21                       | 6                       | 3.5                |
| 250                      | 16.7                     | 4.8                     | 3.5                |
| 100                      | 12.3                     | 3.5                     | 3.5                |
| 50                       | 9.7                      | 2.8                     | 3.5                |
| 25                       | 7.6                      | 2.2                     | 3.5                |

Table S2: Fused Deposition Modelling (FDM) and Selective Laser Sintering (LS) technical specifications, manufacturing processes and applications for the proposed chambers.

|                                   | <b>Fused Deposition Modelling (FDM)</b>                              | <b>Laser Sintering (LS)</b>           |
|-----------------------------------|----------------------------------------------------------------------|---------------------------------------|
| <b>Equipment</b>                  | Ultimaker 2+                                                         | EOS Formiga P100                      |
| <b>Material Type</b>              | Polylactic acid (PLA)                                                | Polyamide-12 (PA-12)                  |
| <b>Print Resolution</b>           | Nozzle size: 250 $\mu\text{m}$<br>Layer thickness: 100 $\mu\text{m}$ | Layer thickness: 60 $\mu\text{m}$     |
| <b>Print/Equipment Cost</b>       | Low                                                                  | High                                  |
| <b>Post Processing</b>            | Not required                                                         | Un-sintered powder removal            |
| <b>Commercial Availability</b>    | High                                                                 | Moderate                              |
| <b>Material Biocompatibility</b>  | Excellent                                                            | Excellent                             |
| <b>Reusability</b>                | Sterilisable via UV irradiation/alcohol immersion                    | Fully autoclavable                    |
| <b>Collagen Mould Scalability</b> | 50 $\mu\text{L}$ to 500 $\mu\text{L}$                                | 50 $\mu\text{L}$ to 500 $\mu\text{L}$ |
| <b>Success Rate (%)</b>           | > 90                                                                 | >90                                   |
